# Supplementary material for: Protein mixtures of environmentally friendly zein to understand protein–protein interactions through biomaterials synthesis, hemolysis, and their antimicrobial activities
Source: Royal Society of Chemistry journal article supplement (doi:10.1039/c4cp01457j), 2014-01-01
Supplement: c4cp01457j1.pdf [file c4cp01457j1.pdf]

***Protein Mixtures of Environmental Friendly Zein  
to understand Protein – Protein Interactions  
through Biomaterials Synthesis, Hemolysis, and  
their Antimicrobial Activities***

***Aabroo Mahal, Manoj Kumar, Poonam Khullar, Harsh Kumar,  
Narinder Singh, Gurinder Kaur, Mandeep Singh Bakshi\****

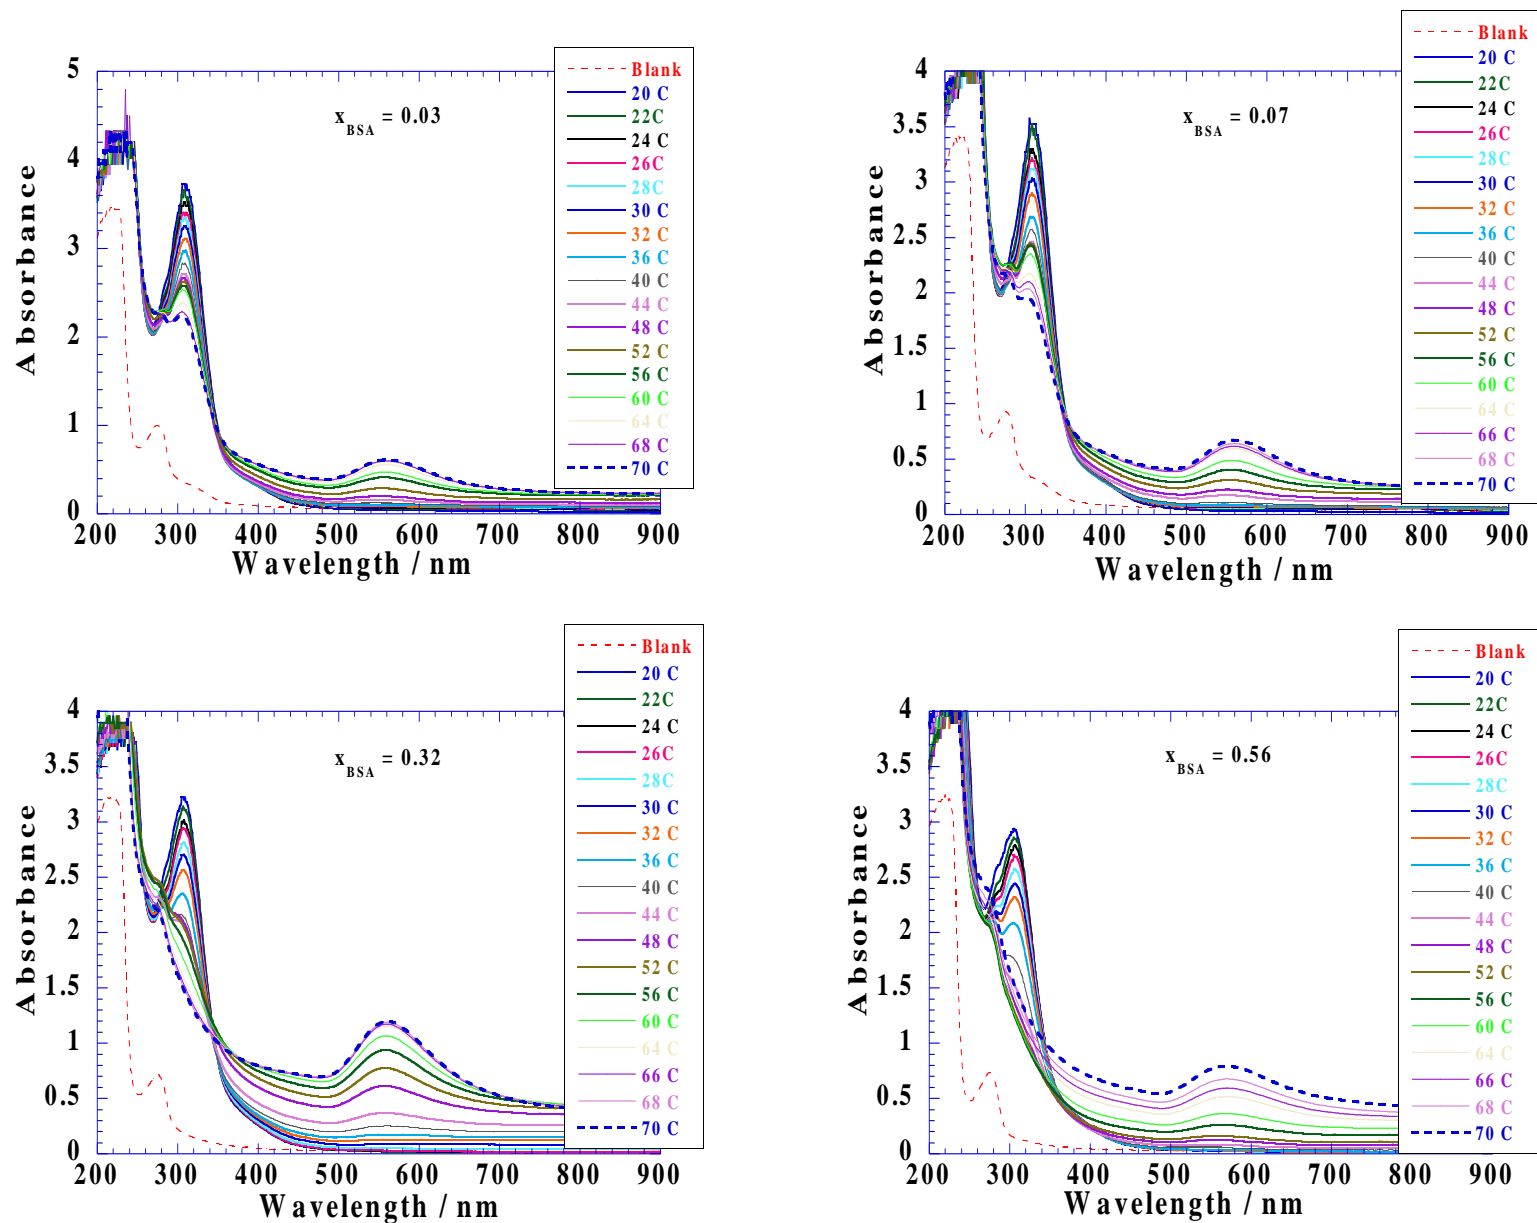

Fig S1. UV-visible scans of various of some reactions at different mole fractions of BSA.

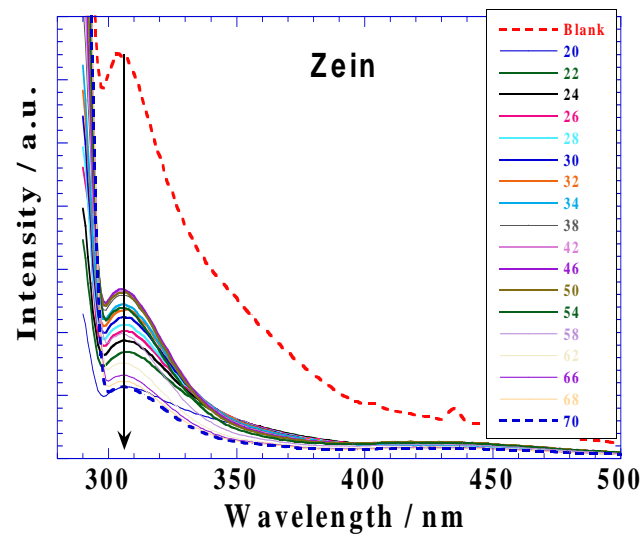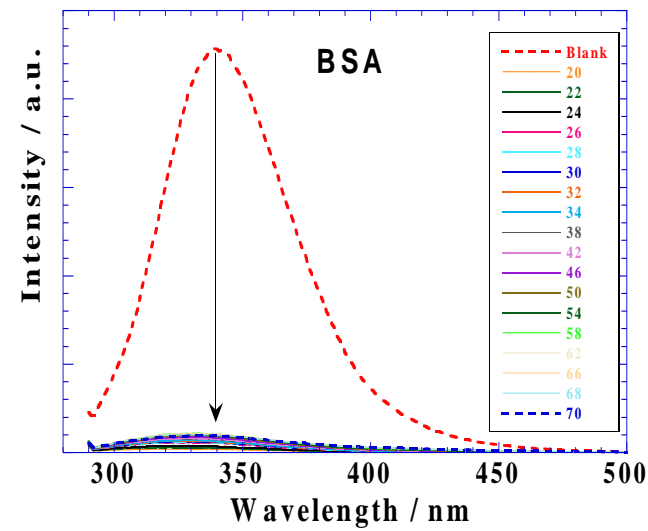

Fig S2. Fluorescence emission scans of reactions of zein and BSA.

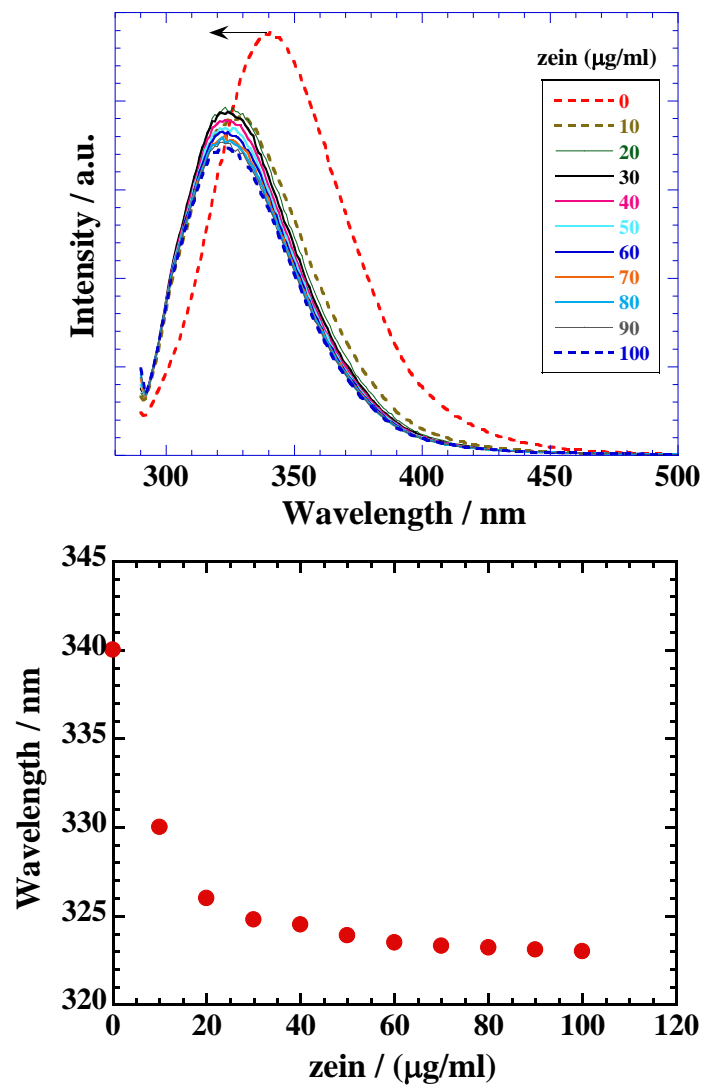

Fig S3. Fluorescence emission scans of addition of zein in aqueous BSA (above) and lower variation of the intensity.

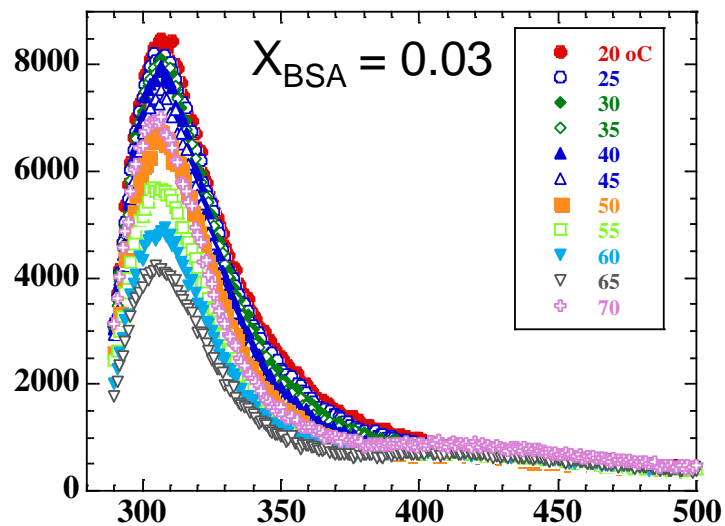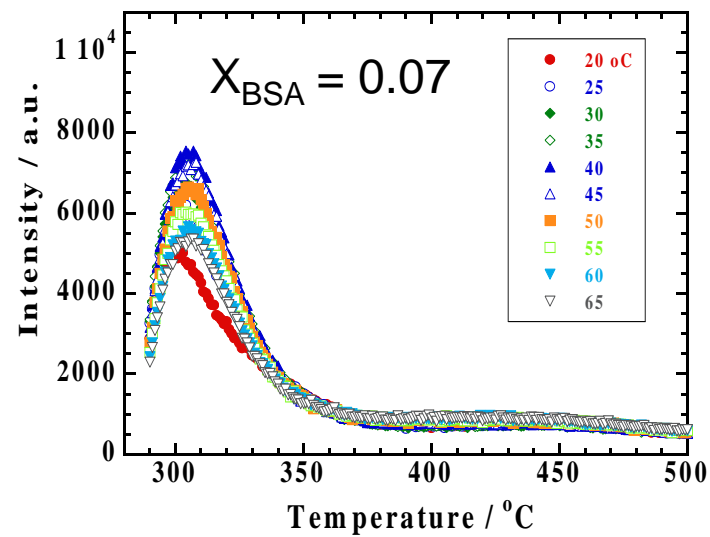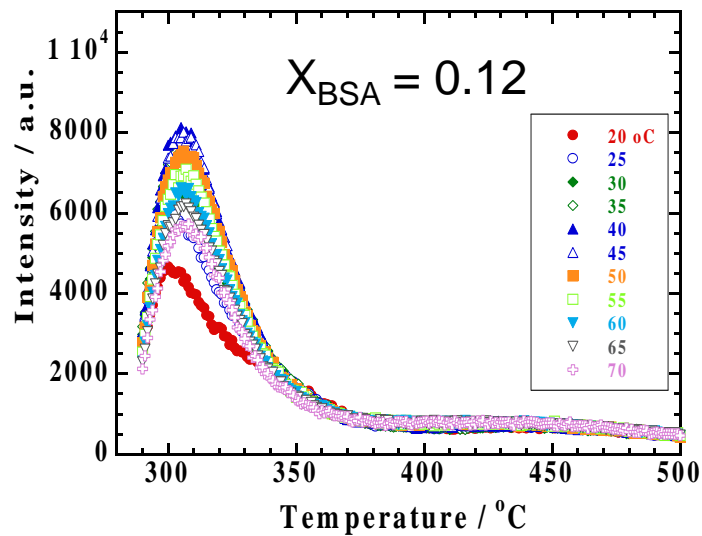

Fig S4. Fluorescence emission scans of some of the reactions at different mole fractions of BSA.

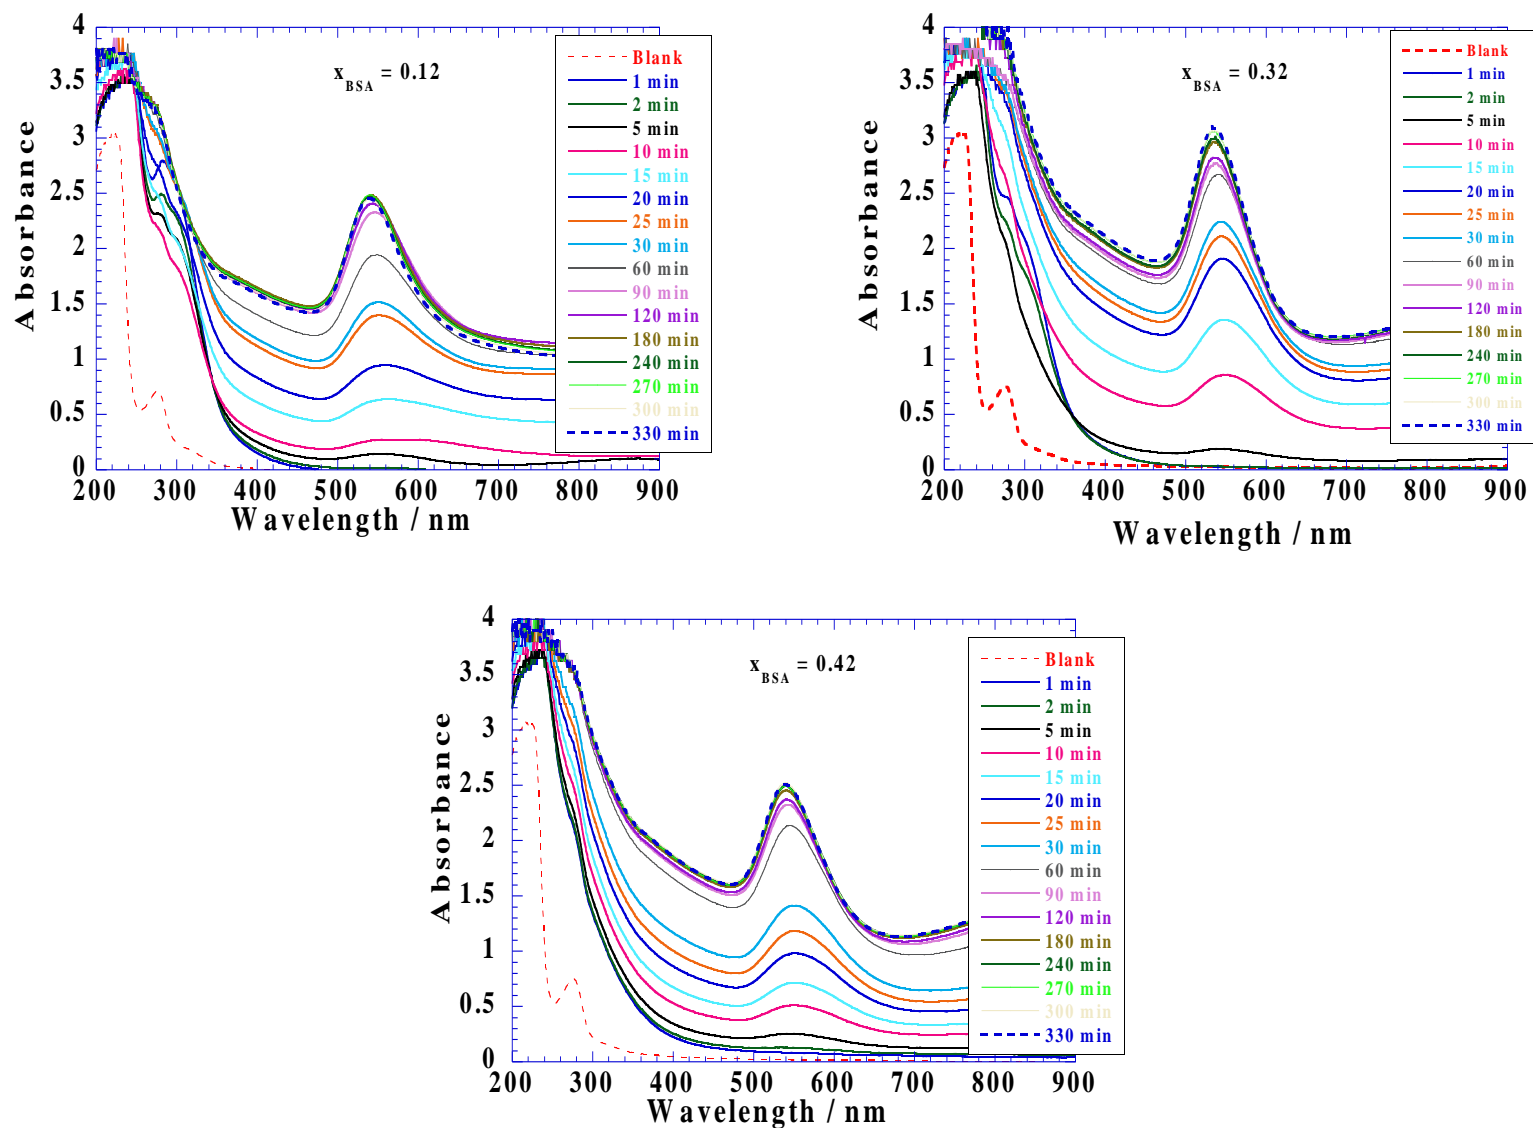

Fig S5. UV-visible scans of various of some reactions at different mole fractions of BSA.

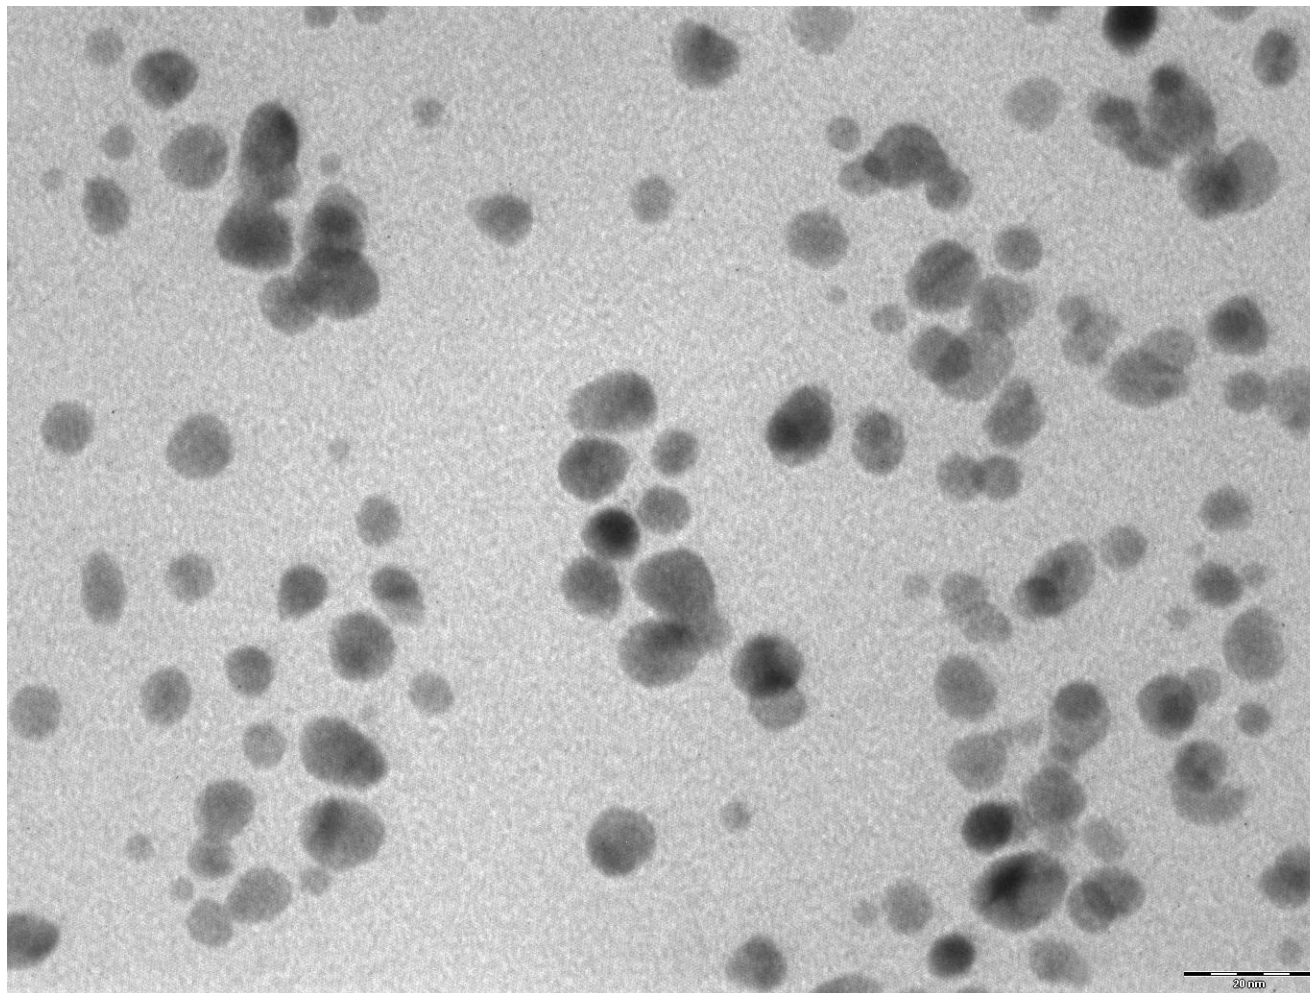

Fig S6. TEM image of citrate stabilized Au NPs. Scale bar is 20 nm.

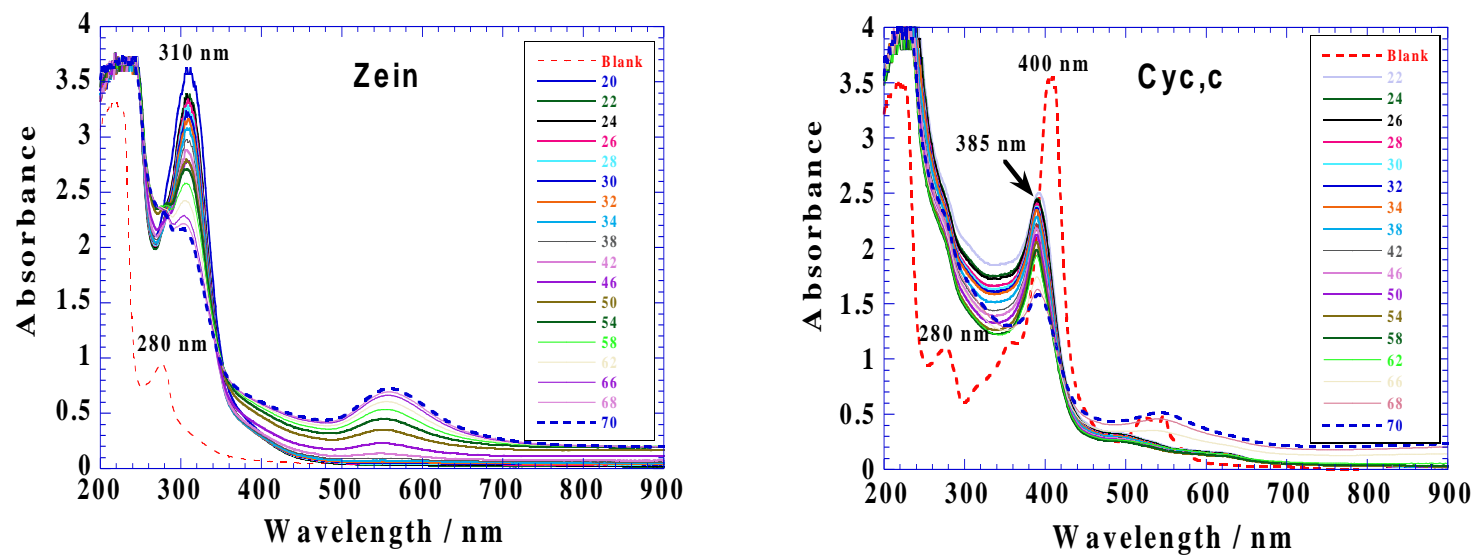

Fig S7. UV-visible scans of reactions in the presence of zein and Cyc,c.



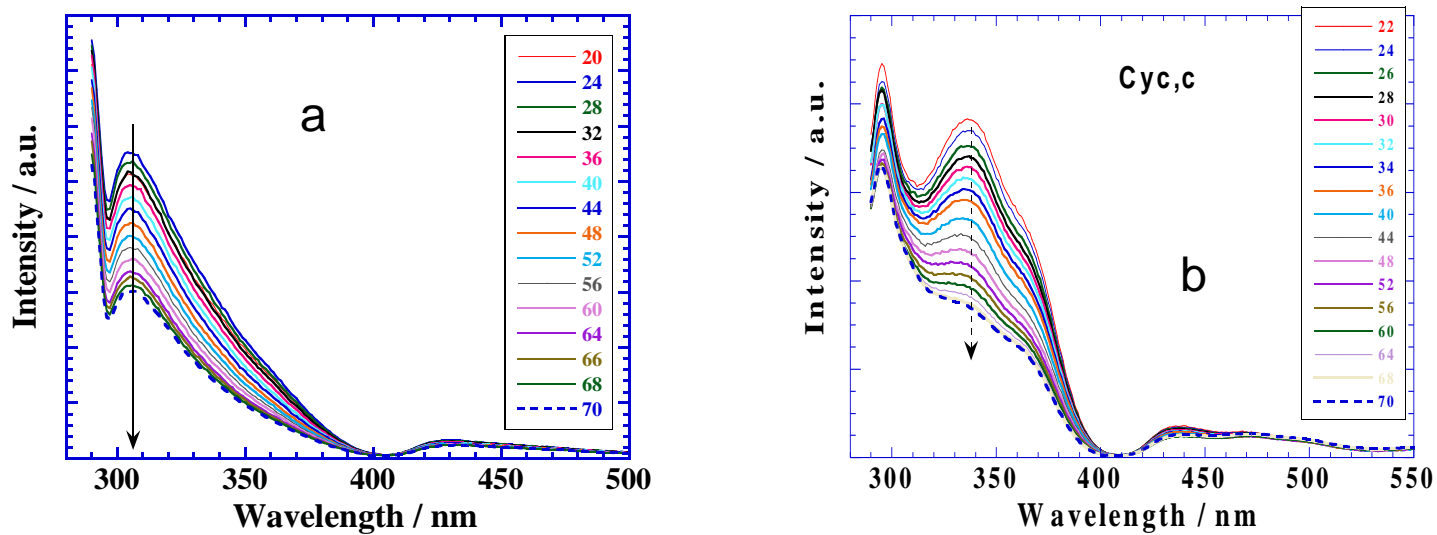

Fig S8. Fluorescence emission scans of reactions of Cyc,c in the absence and presence of gold salt.

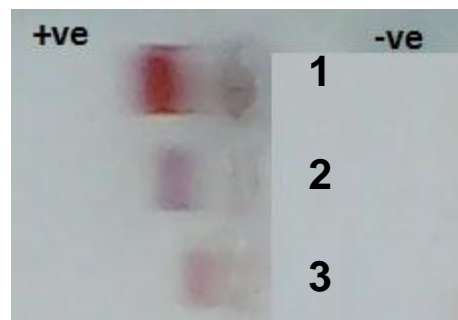

- 1:           zein coated Au NPs**  
**2.            $x_{BSA} = 0.24$**   
**3.            $x_{BSA} = 0.53$**

Fig S9. Gel electrophoresis of some samples of Au NPs coated with zein + BSA complex.

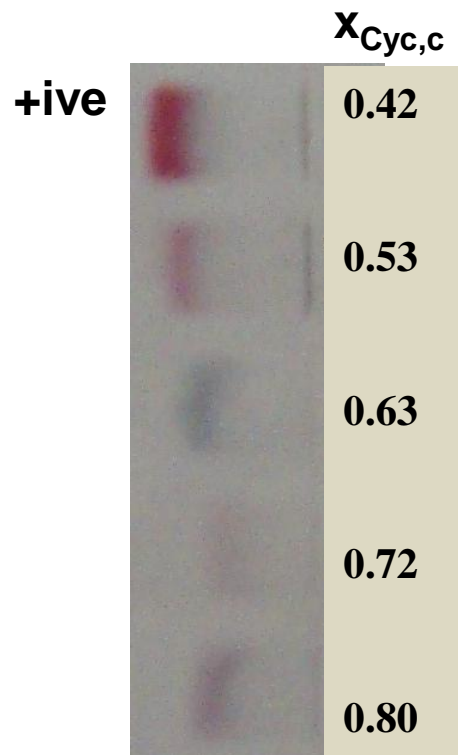

Fig S10. Gel electrophoresis of some samples of Au NPs coated with zein + Cyc,c complex.
